# Supplementary material for: Role of Microbial Communities in the Weathering and Stalactite Formation in Karst Topography
Source: Copernicus journal article supplement (doi:10.5194/bg-2019-12), 2019-02-15
Supplement: Supplementary file 1 [file bg-2019-12-supplement.pdf]

| <b>Bacteria Species</b>               | <b>NCBI Sequence ID</b>                                                          |
|---------------------------------------|----------------------------------------------------------------------------------|
| <i>Achromobacter deleyi</i>           | HG324053.1                                                                       |
| <i>Achromobacter kerstersii</i>       | HG324052.1                                                                       |
| <i>Achromobacter pestifer</i>         | HG324051.1                                                                       |
| <i>Achromobacter spiritinus</i>       | HE613447.1                                                                       |
| <i>Acidithiobacillus ferrooxidans</i> | AM890075.2<br>AH001793.2                                                         |
| <i>Acinetobacter baumannii</i>        | AB594765.1                                                                       |
| <i>Acinetobacter calcoaceticus</i>    | AB626122.1                                                                       |
| <i>Acinetobacter hwoffii</i>          | AB626125.1                                                                       |
| <i>Acinetobacter sp.</i>              | Z93454.1<br>FM177774.1                                                           |
| <i>Agrobacterium radiobacter</i>      | AJ389904.1<br>AJ130719.1<br>AM181758.1                                           |
| <i>Aminobacter aminovorans</i>        | LT984904.1<br>LN995690.1                                                         |
| <i>Aminobacter anthyllidis</i>        | FR869633.2                                                                       |
| <i>Aminobacter sp.</i>                | AB905480.1<br>FM886907.1                                                         |
| <i>Arthrobacter oxydans</i>           | LN880075.1<br>LN774480.1                                                         |
| <i>Arthrobacter sp.</i>               | KM362724.1                                                                       |
| <i>Azospirillum brasilense</i>        | AB681745.1<br>DQ438999.1                                                         |
| <i>Azospirillum lipoferum</i>         | LN874293.1                                                                       |
| <i>Azospirillum oryzae</i>            | AB185396.1                                                                       |
| <i>Azospirillum zea</i>               | HE977584.1                                                                       |
| <i>Azotobacter chroococcum</i>        | AB430880.1<br>LN874290.1                                                         |
| <i>Azotobacter vinelandii</i>         | LK391702.1<br>LN874283.1<br>LN874283.1                                           |
| <i>Bacillus caldolyticus</i>          | EF472596.1                                                                       |
| <i>Bacillus caldotenax</i>            | EU484354.1<br>AY952967.1                                                         |
| <i>Bacillus cereus</i>                | NR_074540.1                                                                      |
| <i>Bacillus clarkii</i>               | X76444.1                                                                         |
| <i>Bacillus mucilaginosus</i>         | AY571332.1<br>DQ898310.1<br>DQ898308.1<br>DQ898307.1<br>DQ898309.1               |
| <i>Bacillus mycoides</i>              | AB547222.1                                                                       |
| <i>Bacillus oceani</i>                | KC160501.1                                                                       |
| <i>Bacillus selenitireducens</i>      | AF064704.1<br>NR_028707.1                                                        |
| <i>Bacillus sp.</i>                   | AM179887.1<br>DQ643085.1                                                         |
| <i>Bacillus subtilis</i>              | AJ277905.1<br>AJ277906.1<br>M87888.1<br>AB018487.1<br>AH013002.3                 |
| <i>Bacillus thermocloacae</i>         | Z26939.1<br>NR_036986.1                                                          |
| <i>Bacillus thuringiensis</i>         | AM779002.1<br>FJ358616.1                                                         |
| <i>Bacillus vedderi</i>               | Z48306.1<br>NR_026526.1                                                          |
| <i>Burkholderia fungorum</i>          | AB091193.1<br>EF650018.1<br>KJ026454.1<br>JF708122.1<br>KM263605.1<br>KU321260.1 |

| <b>Bacteria Species</b>                  | <b>NCBI Sequence ID</b>                                             |
|------------------------------------------|---------------------------------------------------------------------|
| <i>Gordonia amarae</i>                   | AF020329.1                                                          |
|                                          | AF020330.1                                                          |
|                                          | AF020331.1                                                          |
|                                          | AF020332.1                                                          |
|                                          | NR_037032.1                                                         |
| <i>Halomonas denitrificans</i>           | AM229317.1                                                          |
| <i>Halomonas elongata</i>                | AM941743.1                                                          |
| <i>Halomonas janggokensis</i>            | AM229315.1                                                          |
| <i>Halomonas sp. BH1</i>                 | FN433898.1                                                          |
| <i>Halomonas sp. SR4</i>                 | JF794994.1                                                          |
| <i>Janthinobacterium agaricidamnosum</i> | AB681849.1                                                          |
| <i>Janthinobacterium lividum</i>         | AB021388.1                                                          |
| <i>Janthinobacterium sp.</i>             | AB252072.1<br>AJ846273.1<br>AM071372.1                              |
| <i>Kocuria carniphila</i>                | AJ622907.1                                                          |
| <i>Kocuria flava</i>                     | HQ331530.1                                                          |
| <i>Kocuria polaris</i>                   | AJ278868.1                                                          |
| <i>Kocuria sp.</i>                       | LT674162.1<br>AB773222.1                                            |
| <i>Labrys methylaminiphilus</i>          | AB236172.1                                                          |
| <i>Labrys miyagiensis</i>                | AB236170.1<br>AB236171.1                                            |
| <i>Labrys okinawensis</i>                | AB236169.1                                                          |
| <i>Labrys sp.</i>                        | LC372609.1                                                          |
| <i>Lysinibacillus composti</i>           | AB547124.1                                                          |
| <i>Lysinibacillus pakistanensis</i>      | AB558495.1                                                          |
| <i>Lysinibacillus parviboronicapiens</i> | AB681953.1                                                          |
| <i>Lysinibacillus sp.</i>                | HG931343.1                                                          |
| <i>Lysinibacillus sphaericus</i>         | JX485781.1                                                          |
| <i>Mycobacterium colombiense</i>         | AM062764.1                                                          |
| <i>Mycobacterium haemophilum</i>         | L24800.1                                                            |
| <i>Mycobacterium phlei</i>               | JX266706.1<br>KF378762.1<br>NR_041906.1<br>GU142920.1<br>GU142927.1 |
| <i>Mycobacterium ratisbonense</i>        | AJ271863.1                                                          |
| <i>Mycobacterium sp.</i>                 | U46146.1<br>X84978.1                                                |
| <i>Paenibacillus polymyxa</i>            | HG324075.1<br>HG324076.1<br>HG324077.1                              |
| <i>Pimelobacter simplex</i>              | NR_036916.1<br>AY509240.1                                           |
| <i>Pseudomonas alcali</i>                | AJ006110.1                                                          |
| <i>Pseudomonas alcalophila</i>           | AB030583.1                                                          |
| <i>Pseudomonas caspiana</i>              | NR_152639.1                                                         |
| <i>Pseudomonas fluorescens</i>           | AJ278814.1<br>FJ972536.1                                            |
| <i>Pseudomonas mendocina</i>             | M59154.1                                                            |
| <i>Pseudomonas putida</i>                | L28676.1                                                            |
| <i>Pseudomonas sp.</i>                   | AJ391194.1<br>AM179883.1<br>AF065166.1<br>AJ417069.1                |
| <i>Pseudomonas stutzeri</i>              | AJ006107.2                                                          |
| <i>Rahnella aquatilis</i>                | AB675632.1<br>AB725657.1<br>LK391526.1<br>LT608120.1                |
| <i>Rhizobium leguminosarum</i>           | D14513.1                                                            |
| <i>Rhizobium sp.</i>                     | LN832063.1<br>AB755791.1                                            |
| <i>Rhizobium tropici</i>                 | D11344.1                                                            |

| <b>Bacteria Species</b>          | <b>NCBI Sequence ID</b> | <b>Bacteria Species</b>           | <b>NCBI Sequence ID</b> |
|----------------------------------|-------------------------|-----------------------------------|-------------------------|
| <i>Burkholderia gladioli</i>     | AH004175.2              | <i>Rhizobium tropici</i>          | X67234.2                |
| <i>Burkholderia glathei</i>      | AB021374.1              | <i>Serratia marcescens</i>        | AJ550467.1              |
| <i>Burkholderia mallei</i>       | AH004174.2              |                                   | HG423362.1              |
| <i>Burkholderia solanacearum</i> | U28233.1                | <i>Serratia rubidaea</i>          | AB681976.1              |
|                                  | U28230.1                | <i>Serratia sp.</i>               | AJ846269.1              |
|                                  | U28229.1                |                                   | FM178865.2              |
|                                  | U28231.1                | <i>Shewanella abyssii</i>         | AB201475.1              |
|                                  | U28232.1                | <i>Shewanella morhuae</i>         | AB205576.1              |
| <i>Burkholderia uboniae</i>      | AB030584.1              | <i>Shewanella oneidensis</i>      | AB968243.1              |
| <i>Citrobacter braakii</i>       | HG798904.1              |                                   | NR_074798.1             |
| <i>Citrobacter freundii</i>      | AB626119.1              |                                   | MG563755.1              |
| <i>Citrobacter koseri</i>        | HG798905.1              |                                   | MG563756.1              |
| <i>Citrobacter rodentium</i>     | AB682287.1              |                                   | KC594645.1              |
| <i>Citrobacter sp.</i>           | KY774317.1              | <i>Shewanella putrefaciens</i>    | AJ000213.1              |
| <i>Collimonas fungivorans</i>    | AB740921.1              | <i>Shewanella surugensis</i>      | AB094597.1              |
|                                  | AJ310394.2              | <i>Sphingomonas anadarae</i>      | AB261013.1              |
| <i>Collimonas pratensis</i>      | AY281143.1              | <i>Sphingomonas ginsengisoli</i>  | AB245347.1              |
| <i>Collimonas sp.</i>            | LT719158.1              | <i>Sphingomonas paucimobilis</i>  | D13725.1                |
|                                  | FR729923.1              | <i>Sphingomonas sanguinis</i>     | D13726.1                |
| <i>Dyella ginsengisoli</i>       | AB245367.1              | <i>Sphingomonas sp.</i>           | AF385529.1              |
| <i>Dyella japonica</i>           | AB681770.1              | <i>Sporosarcina globispora</i>    | AB681045.1              |
| <i>Dyella korensis</i>           | AB681264.1              | <i>Sporosarcina korensis</i>      | AB682452.1              |
| <i>Dyella sp.</i>                | FR822525.1              | <i>Sporosarcina pasteurii</i>     | KR185867.1              |
|                                  | MG460580.1              |                                   | KC211297.1              |
| <i>Enterobacter cloacae</i>      | AJ251469.1              | <i>Sporosarcina psychrophila</i>  | AB680853.1              |
|                                  | AB680426.1              | <i>Sporosarcina saromensis</i>    | AB243859.1              |
| <i>Enterobacter hormaechei</i>   | AB682284.1              | <i>Staphylococcus aureus</i>      | D83356.1                |
| <i>Enterobacter kobei</i>        | AB616140.1              | <i>Staphylococcus epidermidis</i> | D83363.1                |
| <i>Enterobacter sp.</i>          | U39556.1                | <i>Staphylococcus lugdunensis</i> | NR_024668.1             |
| <i>Escherichia coli</i>          | J01859.1                | <i>Staphylococcus lutrae</i>      | AB233333.1              |
|                                  | HM194886.1              | <i>Staphylococcus sp.</i>         | FR687206.1              |
|                                  | KF535120.1              | <i>Streptomyces lividans</i>      | AB184826.1              |
|                                  | AF527827.1              |                                   | AB184695.1              |
|                                  | NR_024570.1             | <i>Streptomyces pilosus</i>       | AB184161.1              |
|                                  | Z83204.1                |                                   | MH244332.1              |
|                                  | Z83205.1                | <i>Streptomyces sp.</i>           | AJ002086.1              |
|                                  | KJ937037.1              |                                   | AJ002088.1              |
| <i>Frateuria aurantia</i>        | AJ010481.1              |                                   | AJ002087.1              |
|                                  | AB091200.1              |                                   | AJ002089.1              |
| <i>Frateuria sp.</i>             | AB264175.1              |                                   | KX427167.1              |
| <i>Frateuria terrea</i>          | AB682159.1              | <i>Thiobacillus ferrooxidans</i>  | AH001791.2              |
|                                  | EU682683.1              |                                   | AH001792.2              |
| <i>Geobacter metallireducens</i> | L07834.1                |                                   | AH001796.2              |
|                                  | NR_075011.1             |                                   | AH001795.2              |
|                                  | NR_025895.1             |                                   | AH001788.2              |

Supplementary Table I. References of weathering bacteria and their corresponding sequences for Blasting

| <b>Bacteria Species</b>                  | <b>NCBI Sequence ID</b>  |
|------------------------------------------|--------------------------|
| <i>Bacillus cereus</i>                   | NR 074540.1              |
| <i>Bacillus megaterium</i>               | JX893034.1<br>KC121060.1 |
| <i>Bacillus mycoides</i>                 | AB547222.1               |
| <i>Bacillus sp.</i>                      | DQ643085.1<br>AM179887.1 |
| <i>Bacillus subtilis</i>                 | AB018487.1               |
| <i>Bacillus thuringiensis</i>            | AM779002.1               |
| <i>Halomonas denitrificans</i>           | AM229317.1               |
| <i>Halomonas elongata</i>                | AM941743.1               |
| <i>Halomonas janggokensis</i>            | AM229315.1               |
| <i>Halomonas sp.</i>                     | FN433898.1<br>JF794994.1 |
| <i>Kocuria carniphila</i>                | AJ622907.1               |
| <i>Kocuria flava</i>                     | HQ331530.1               |
| <i>Kocuria polaris</i>                   | AJ278868.1               |
| <i>Kocuria sp.</i>                       | AB773222.1<br>LT674162.1 |
| <i>Lysinibacillus composti</i>           | AB547124.1               |
| <i>Lysinibacillus pakistanensis</i>      | AB558495.1               |
| <i>Lysinibacillus parviboronicapiens</i> | AB681953.1               |
| <i>Lysinibacillus sp.</i>                | HG931343.1               |
| <i>Lysinibacillus sphaericus</i>         | JX485781.1               |
| <i>Sporosarcina globispora</i>           | AB681045.1               |
| <i>Sporosarcina koreensis</i>            | AB682452.1               |
| <i>Sporosarcina pasteurii</i>            | KC211297.1<br>KR185867.1 |
| <i>Sporosarcina psychrophila</i>         | AB680853.1               |
| <i>Sporosarcina saromensis</i>           | AB243859.1               |

Supplementary Table 2. Reference DNA sequences for urease-producing bacteria
